# Supplementary material
Source: PubMed Central journal article supplement (PMC5528431)

# **Enrichment Map Profiling of the Cancer Invasion Front Suggests Regulation of Colorectal Cancer Progression by Bone Morphogenetic Protein Antagonists**

George S. Karagiannis, Aaron Berk, Apostolos Dimitromanolakis, Eleftherios P. Diamandis

## **Supplementary Figure Legends**

**Supplementary Figure 1.** Enrichment map profiling of DPD reveals overrepresentation of functional clusters associated with cancer development and progression. Nodes represent GO terms and lines demonstrate their connectivity. This map represents raw results before assorting the GO clusters into functional clusters.

**Supplementary Figure 2.** COL12A1 expression in the stromal collagen and myofibroblasts, as well as around tumor cells of the desmoplastic CIF (arrows), in cases of human CRC described in our previous study (16). *Magnification X400; upper right box is X3 magnification of selected area.*

**Supplementary Figure 3.** Optimization of the under-the-agarose cell migration assay. The punching of the central and peripheral cavities were performed as explained in Supplementary Materials & Methods. In this experiment all four peripheral wells were filled with DMEM supplemented with 10% FBS to generate a chemotactic gradient. No additional motogens were utilized. Interestingly, approximately 25% of the total cell population migrated towards each individual quadrant. There was no statistically significant difference between the intensities observed in all four quadrants (ANOVA;  $p > 0.05$ ), suggesting that potential differences in the actual experimental setups could be attributed to the addition of motogens in certain wells.



**Supplementary Figure 2**

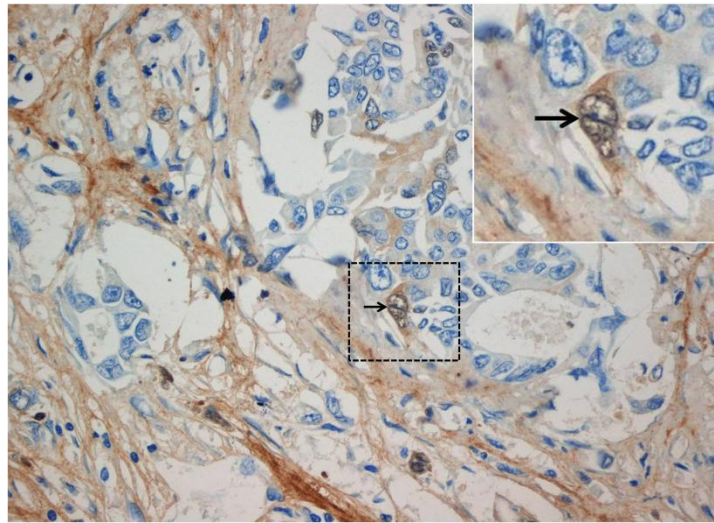

### Supplementary Figure 3

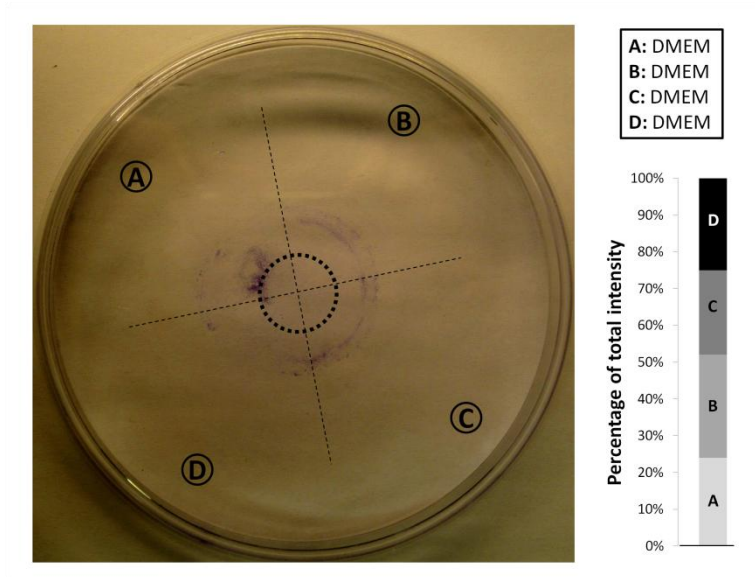

Supplement: MOL2-7-826-s004.pdf [file MOL2-7-826-s004.pdf]
